# Supplementary material
Source: MDPI journal article supplement (https://www.mdpi.com/2073-4344/12/5/523)
Supplement: s1 [file s1]

Supplementary Material for

# Dependence of Photocatalytic Activity on the Morphology of Strontium Titanates

Tamás Gyulavári <sup>1,\*</sup>, Daniella Dusnoki <sup>1</sup>, Viktória Márta <sup>1</sup>, Mohit Yadav <sup>1</sup>, Mahsa Abedi <sup>1</sup>, András Sági <sup>1</sup>, Ákos Kukovecz <sup>1</sup>, Zoltán Kónya <sup>1</sup> and Zsolt Pap <sup>1,2,3,\*</sup>

<sup>1</sup> Department of Applied and Environmental Chemistry, University of Szeged, Rerrich Béla Sqr. 1, H-6720 Szeged, Hungary; d.daniella0226@gmail.com (D.D.); martaviktoria95@gmail.com (V.M.); yadavmohit27@gmail.com (M.Y.); mahsa.sh.abedi@gmail.com (M.A.); sapia@chem.u-szeged.hu (A.S.); kakos@chem.u-szeged.hu (Á.K.); konya@chem.u-szeged.hu (Z.K.)

<sup>2</sup> Nanostructured Materials and Bio-Nano-Interfaces Center, Interdisciplinary Research Institute on Bio-Nano-Sciences, Babes-Bolyai University, Treboniu Laurian 42, RO-400271 Cluj-Napoca, Romania

<sup>3</sup> Institute of Research-Development-Innovation in Applied Natural Sciences, Babes-Bolyai University, Fântânele Str. 30, RO-400294 Cluj-Napoca, Romania

\* Correspondence: gyulavarit@chem.u-szeged.hu (T.G.); pzsolt@chem.u-szeged.hu (Z.P.); Tel.: +36-62-544-626 (T.G.); +36-62-543-795 (Z.P.)

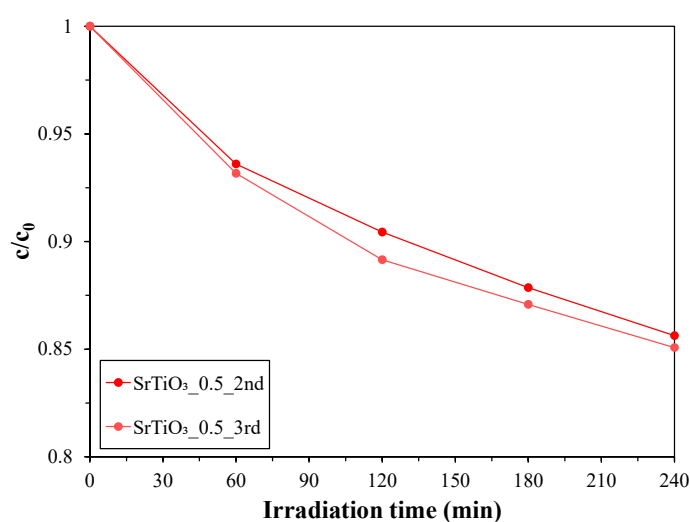

**Figure S1:** Degradation curves of phenol repeated two times using SrTiO<sub>3</sub>\_0.5.

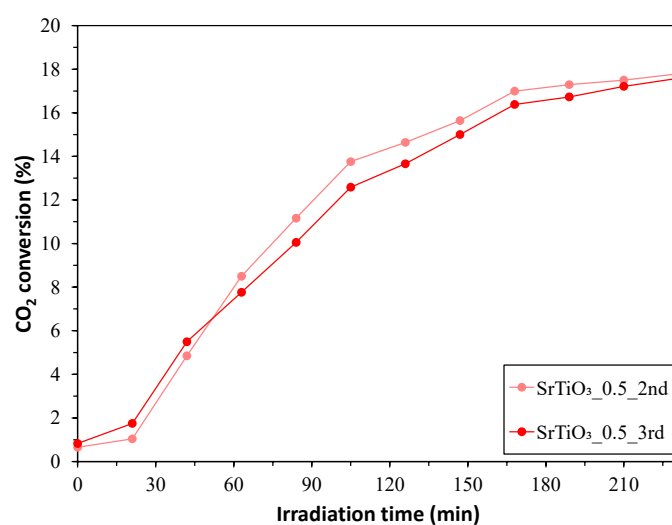

**Figure S2:** Photocatalytic conversion of CO<sub>2</sub> repeated two times using SrTiO<sub>3</sub>\_0.5.

**Table S1.** Comparison of photocatalytic activity results of the present study with other ones from the literature.

| Model Compound  | Photocatalytic Activity                          | Irradiation     | Citation              |
|-----------------|--------------------------------------------------|-----------------|-----------------------|
| Phenol          | ~15% conversion over 3 h                         | UV              | Ahuja et al. [45]     |
| Phenol          | ~5–15% conversion over 1 h                       | UV and visible  | Grabowska et al. [46] |
| CO <sub>2</sub> | ~0% CH <sub>4</sub> selectivity over 10 h        | visible         | Bi et al. [47]        |
| CO <sub>2</sub> | ~5% CH <sub>4</sub> selectivity over 6 h         | simulated solar | Luo et al. [48]       |
| CO <sub>2</sub> | ~0.5–2% selectivity for CH <sub>4</sub> over 5 h | UV              | Li et al. [49]        |
